# Supplementary material for: Can high-intensity interval training and small-sided games be effective for improving physical fitness after detraining? A parallel study design in youth male soccer players
Source: PeerJ. 2022 Jul 1;10:e13514. doi: 10.7717/peerj.13514 (PMC9252184; doi:10.7717/peerj.13514)
Supplement: Supplemental Information 1 [file peerj-10-13514-s001.xls]

## Sheet: Datas
	Group	Age	Training age	Weight-1	Weight-2	Weight-3	Height-1	Height-2	Height-3	Bmi-1	Bmi-2	Bmi-3	FP-1	FP-2	FP-3	30-15IFT-1	30-15IFT-2	30-15IFT-3	Yo-Yo dist-1	Yo-Yo dist-2	Yo-Yo dist-3	Yo-Yo Vo-1	Yo-Yo Vo-2	Yo-Yo Vo-3	CMJ-1	CMJ-2	CMJ-3	SBJ-1	SBJ-2	SBJ-3	3-Hop dist-1	3-Hop dist-2	3-Hop dist-3	0-5 s-1	0-5 s-2	0-5 s-3	0-10 s-1	0-10 s-2	0-10 s-3	0-20 s-1	0-20 s-2	0-20 s-3	Zig-Zag WB-1	Zig-Zag WB-2	Zig-Zag WB-3	Zig-Zag WoB-1	Zig-Zag WoB-2	Zig-Zag WoB-3	3-corner-1
SSG	1	16	3	50.9	51.4	51.5	179	179	179	15.8859	16.0419	16.0732	12.7	13.5	13.9	20	16.5	18.5	2000	1600	1840	53.2	49.84	51.856	41.5	37.6	40.9	217	198	221	648	581	590	0.89	1.04	0.93	1.56	1.75	1.68	2.68	2.95	2.8	6.28	6.29	6.21	5.06	5.26	5.16	32
	1	17	4	51.6	53.3	52.3	169	169	169	18.0666	18.6618	18.3117	11.2	15	14.1	21	17	19.5	2120	1540	1800	54.208	49.336	51.52	50.5	46.2	49.7	220	194	212	644	565	585	0.91	1.06	0.98	1.53	1.71	1.69	2.74	2.97	2.87	5.86	6.56	5.87	4.95	5.31	5.15	33.61
	1	16	4	57.7	59.6	58.7	177	177	177	18.4174	19.0239	18.7366	10.4	13.2	12.9	19	15.5	18	1640	1200	1520	50.176	46.48	49.168	46.5	39.3	43.7	201	179	194	615	576	590	0.82	1.09	0.99	1.53	1.8	1.64	2.89	3.07	2.94	6.24	7.01	6.44	4.96	5.11	5.05	32.63
	1	17	5	67.1	72	70.9	183	183	183	20.0364	21.4996	21.1711	14.7	15.9	14.1	19.5	16	18	1800	1440	1580	51.52	48.496	49.672	46.1	39	42.7	202	192	196	622	570	590	0.95	0.98	0.84	1.6	1.65	1.6	2.63	2.92	2.79	6.41	6.84	6.44	5.01	5.4	5.24	33.1
	1	16	3	63.5	64.4	64.1	173	173	173	21.2169	21.5176	21.4174	12.1	12.9	12.4	19	15.5	18	1640	1140	1480	50.176	45.976	48.832	36	35.2	35.3	192	167	190	603	575	596	0.9	1.01	0.91	1.51	1.78	1.7	2.59	3.21	3.04	6.44	6.73	6.51	5.09	5.54	5.34	36.15
	1	16	4	63.5	65.1	63.8	164	164	164	23.6095	24.2043	23.721	13.5	14.7	13.8	18.5	16	18	1520	1200	1440	49.168	46.48	48.496	38.9	38	37.6	210	198	201	615	572	587	0.94	1.08	1.05	1.54	1.85	1.78	3.04	3.27	3.22	6.56	6.97	6.63	5.31	5.59	5.48	33.61
	1	16	5	67.7	68.2	67.9	165	165	165	24.8669	25.0505	24.9403	12.9	15.7	14.5	19.5	16	18	1840	1360	1560	51.856	47.824	49.504	47.3	38.7	45.3	207	182	197	597	558	575	0.86	0.87	0.86	1.44	1.69	1.49	2.64	2.66	2.53	6.07	6.74	6.17	5.14	5.33	5.27	32.38
	1	16	4	58.5	62.6	60.2	171	171	171	20.0062	21.4083	20.5875	12.3	14.1	12.9	21.5	16.5	20	2400	1660	2180	56.56	50.344	54.712	42.5	36.6	41.1	203	202	212	584	553	578	0.81	1	0.94	1.36	1.8	1.69	2.26	3.11	2.99	5.85	6.36	6.01	4.98	5.16	5.05	31.08
	1	16	4	68.3	72.7	70.8	177	177	177	21.8009	23.2053	22.5989	10.3	15.1	13.1	19	15.5	17.5	1560	1200	1480	49.504	46.48	48.832	36.3	32.1	34.6	238	196	220	606	543	569	0.84	1.01	0.95	1.6	1.74	1.64	2.68	2.88	2.95	6.56	6.75	6.57	5.17	5.65	5.42	35.12
	1	16	4	70.9	73.9	71.6	172	172	172	23.9657	24.9797	24.2023	12.4	14.2	13.7	20	16.5	18.5	2000	1680	1840	53.2	50.512	51.856	42.1	39.1	40.4	231	208	222	609	588	605	0.93	0.96	0.95	1.56	1.68	1.61	2.79	2.96	3.01	6.68	7.72	6.98	5.09	5.45	5.29	32.47
	1	17	5	72.9	74.5	73.2	170	170	170	25.2249	25.7785	25.3287	13.4	15.7	14.3	19.5	16	18.5	1780	1440	1560	51.352	48.496	49.504	48.2	42.7	45.2	224	186	218	620	560	583	0.89	1.02	0.95	1.52	1.71	1.56	2.65	2.92	2.84	5.9	6.72	6.08	4.89	5.54	5.36	33.79
	1	16	4	63.2	68.4	66.9	181	181	181	19.2912	20.8785	20.4206	13.6	14.2	13.9	20	16.5	18.5	1840	1440	1640	51.856	48.496	50.176	43	37.3	41.2	195	179	196	578	534	550	0.96	0.99	0.96	1.75	1.83	1.81	2.8	3.08	3.01	6.41	7.37	6.45	5.08	5.91	5.56	31.79
	1	16	4	62.9	65.9	64	177	177	177	20.0772	21.0348	20.4284	12.5	13.1	12.7	20	16	18.5	1760	1560	1640	51.184	49.504	50.176	44.4	38.9	42.6	223	188	217	631	554	568	0.9	1.01	0.99	1.66	1.77	1.72	2.72	3.05	3.02	6.56	7.28	6.77	5.33	5.56	5.45	33.6
	1	16	4	66.1	68.3	67.1	173	173	173	22.0856	22.8207	22.4197	13.3	14.3	13.7	19.5	16.5	18.5	1600	1180	1420	49.84	46.312	48.328	41.2	37.9	40.2	251	196	230	618	598	610	0.83	1.01	1	1.43	1.78	1.68	2.68	3.1	2.98	5.85	7.12	6.06	5.26	5.71	5.47	32.27
	1	16	4	73.2	75.1	74.4	179	179	179	22.8457	23.4387	23.2202	13.9	14.4	13.5	18.5	16	18	1560	1320	1520	49.504	47.488	49.168	44	40.9	42.4	237	186	225	611	549	562	0.91	1.02	0.94	1.61	1.71	1.65	2.69	2.89	2.87	6.36	7.16	6.45	5.31	6	5.75	32.35
	1	16	4	64	65.8	64.3	173	173	173	21.3839	21.9854	21.4842	13.9	16.5	15.1	18.5	15	17.5	1620	1240	1460	50.008	46.816	48.664	48.3	43.4	45.5	235	196	231	638	607	616	0.93	1.04	0.97	1.5	1.7	1.65	2.9	2.95	2.96	6.27	7.27	6.42	4.97	5.62	5.37	33.86
	1	17	5	72.4	73.1	72.2	182	182	182	21.8573	22.0686	21.7969	11.2	14.1	13.2	18.5	16.5	18	1520	1080	1380	49.168	45.472	47.992	42.5	37.1	39.8	224	183	229	610	572	591	0.85	0.99	0.94	1.6	1.71	1.63	2.64	2.87	2.83	6.11	6.68	6.22	5.12	5.86	5.53	34
	1	17	5	57.6	63.7	61.7	172	172	172	19.47	21.5319	20.8559	9.9	13.1	12.7	19	15.5	17.5	1580	1040	1360	49.672	45.136	47.824	51.2	44.5	48.2	231	190	226	614	555	576	0.86	0.97	0.93	1.61	1.73	1.65	2.98	3.07	2.92	6.82	7.33	6.73	5.29	6.04	5.84	32.59
	1	17	4	61.7	63.4	61.9	176	176	176	19.9186	20.4675	19.9832	13.4	16.7	15.1	18	15.5	17.5	1400	1080	1240	48.16	45.472	46.816	39.7	35	37.4	222	189	217	596	542	568	0.94	0.96	0.95	1.6	1.75	1.69	2.97	3.15	3.03	6.24	6.66	6.36	5.3	5.92	5.66	33.64
	1	16	4	63.8	67	66.3	183	183	183	19.051	20.0066	19.7975	15.7	17.1	16.2	18.5	15	18	1580	1220	1420	49.672	46.648	48.328	37.4	33.2	35.6	219	201	221	575	542	567	0.88	1.04	0.97	1.47	1.75	1.65	2.81	3.08	3.01	6.13	6.86	6.28	5.36	5.88	5.58	34.86
	Mean	16.3	4.15	63.875	66.42	65.19	174.8	174.8	174.8	20.9539	21.7802	21.3748	12.665	14.675	13.79	19.35	15.975	18.225	1738	1331	1568	50.9992	47.5804	49.5712	43.38	38.635	41.47	219.1	190.5	213.75	611.7	564.7	582.8	0.89	1.0075	0.95	1.549	1.7445	1.6605	2.739	3.008	2.9305	6.28	6.921	6.3825	5.1335	5.592	5.401	33.245
	Sd	0.470162	0.587143	6.3737	6.50737	6.3551	5.54977	5.54977	5.54977	2.39457	2.35773	2.29008	1.49957	1.26069	0.946962	0.890003	0.549521	0.638151	243.129	202.248	213.384	2.04228	1.69888	1.79242	4.46502	3.58656	4.12835	15.7811	9.62726	13.2898	19.8656	19.4371	16.6563	0.045073	0.0484361	0.046112	0.0871719	0.051756	0.0698476	0.172654	0.138549	0.138202	0.284882	0.361545	0.277865	0.149148	0.279992	0.217471	1.22774
HIIT	2	17	4	63.5	67.2	64.1	185	185	185	18.5537	19.6348	18.729	13.5	14.3	12.9	20	15.5	19.5	1720	1280	1680	50.848	47.152	50.512	46.1	41.4	44.3	207	189	224	604	555	610	0.95	1.03	0.97	1.67	1.74	1.69	2.83	3.06	2.94	6.21	6.59	6.49	4.91	5.46	5.02	31.79
	2	17	5	63.5	66.4	64.5	171	171	171	21.7161	22.7078	22.0581	12	12.7	11.5	20	16	19	1800	1440	1720	51.52	48.496	50.848	39.8	34.4	38	214	207	233	668	627	649	0.97	1.12	1.01	1.76	1.89	1.75	2.89	3.03	2.85	6.21	6.35	6.29	4.88	5.38	4.98	32.83
	2	17	4	67.7	71.1	68.5	175	175	175	22.1061	23.2163	22.3673	11.2	12.2	11.4	19.5	15.5	19	1680	1320	1640	50.512	47.488	50.176	37.5	34.4	36.3	238	206	249	611	549	613	0.93	1.05	0.99	1.62	1.74	1.63	2.98	3.18	2.91	6.41	7.04	6.82	5.45	5.77	5.35	32.92
	2	16	4	58.5	59.5	59	176	176	176	18.8856	19.2084	19.047	12.2	16	13.5	20.5	16	19.5	1900	1420	1820	52.36	48.328	51.688	42.1	37.5	42.4	208	196	229	635	583	642	1.01	1.06	0.99	1.53	1.75	1.6	2.94	3.13	2.95	6.09	7.37	6.97	5.19	5.68	5.3	33.17
	2	16	4	68.3	71.7	69.1	178	178	178	21.5566	22.6297	21.8091	9.7	13.2	11.6	20	15	19	1760	1180	1620	51.184	46.312	50.008	35.7	33.7	36.2	213	171	214	583	553	579	0.95	0.98	0.97	1.69	1.72	1.64	2.97	3.13	2.99	6.29	6.68	6.49	5	5.42	5.04	34.11
	2	17	3	70.9	73.3	71.1	165	165	165	26.0422	26.9238	26.1157	10.8	15.5	11.5	20.5	17	19.5	1920	1400	1820	52.528	48.16	51.688	41.4	33.3	41.3	224	173	229	613	536	605	0.85	0.98	0.9	1.58	1.77	1.59	2.79	3.07	2.91	7.13	7.45	7.28	5.43	5.85	5.49	32.74
	2	16	5	72.9	76.3	73.3	170	170	170	25.2249	26.4014	25.3633	13.7	14.7	14.2	21	17.5	20	2220	1780	2120	55.048	51.352	54.208	42	40.5	42.8	218	164	210	612	536	602	0.94	1.01	0.97	1.69	1.75	1.64	2.79	2.91	2.86	6.34	6.65	6.53	5	5.49	5.11	32.7
	2	16	4	53.2	54.9	53	171	171	171	18.1936	18.775	18.1252	11.6	15.8	12.8	18.5	15	18	1660	1320	1620	50.344	47.488	50.008	42.2	39.7	42.5	223	177	217	638	615	634	0.95	1.1	0.92	1.69	1.71	1.69	2.84	2.98	2.87	6.22	6.44	6.26	5.11	5.4	5.17	30.51
	2	16	3	62.9	64.6	61.4	169	169	169	22.023	22.6183	21.4978	12.5	14.5	12.9	16.5	14.5	15.5	1300	1060	1240	47.32	45.304	46.816	40.8	36.4	39.1	200	181	216	557	486	542	0.97	1.1	1	1.65	1.75	1.59	2.89	3.08	2.95	6.98	7.38	7.12	5.13	5.72	5.26	35.44
	2	17	4	69.1	73.1	70.4	160	160	160	26.9922	28.5547	27.5	12	16.3	13.4	21	16.5	20	1940	1480	1820	52.696	48.832	51.688	45.9	41.7	44.2	225	194	232	627	543	645	0.98	1.03	1	1.64	1.85	1.67	2.89	3.16	3	6.45	6.65	6.51	5.35	5.55	5.22	34.72
	2	17	4	67.5	68.6	67.9	170	170	170	23.3564	23.737	23.4948	12.6	14.6	13.1	20	16	19	1880	1360	1800	52.192	47.824	51.52	50.8	44.7	49	217	195	229	639	580	640	0.93	1.13	1.03	1.66	1.81	1.68	2.81	3.13	2.93	6.46	6.7	6.57	5.11	5.48	5.11	31.88
	2	17	4	65.7	69.3	66.7	183	183	183	19.6184	20.6934	19.917	12.2	16.5	13	20.5	17	19.5	1920	1480	1780	52.528	48.832	51.352	43.4	38.8	42.9	205	177	219	614	555	607	0.95	1.01	0.99	1.71	1.79	1.71	2.94	3.13	3.02	6.74	6.95	6.84	5.34	5.56	5.37	34.61
	2	16	4	57.4	60.9	58.2	179	179	179	17.9145	19.0069	18.1642	11.8	15.4	12.4	21	17	20	2120	1640	2020	54.208	50.176	53.368	40.9	37.4	39.3	227	187	221	621	594	624	0.9	1.11	0.99	1.65	1.81	1.72	2.81	3.08	2.96	6.14	6.63	6.59	5.14	5.29	5.12	31.6
	2	16	4	67.8	71.7	68.4	177	177	177	21.6413	22.8861	21.8328	11.5	14.8	12.7	21	18	20.5	2080	1620	2020	53.872	50.008	53.368	39.7	35	38.4	250	201	238	666	629	662	0.92	0.99	0.96	1.64	1.69	1.64	2.74	2.94	2.84	5.91	6.34	6.17	5.28	5.66	5.31	32.88
	2	17	4	55.2	56.9	56	180	180	180	17.037	17.5617	17.284	13	15.5	13.4	15.5	13.5	15	1280	1000	1180	47.152	44.8	46.312	48.5	42.4	47.1	246	204	245	600	532	586	0.92	1.02	0.92	1.65	1.8	1.7	2.77	3.07	2.93	5.88	6.96	6.51	4.63	5.36	4.76	32.7
	2	16	4	50.4	53.9	51.4	172	172	172	17.0362	18.2193	17.3743	13.7	16	13	18	14	17	1480	1200	1440	48.832	46.48	48.496	43.7	38.1	42.8	193	185	215	613	553	605	1	1.07	1.01	1.72	1.88	1.74	2.91	3.33	3.01	6.48	7.14	6.98	5.38	5.82	5.43	33.51
	2	16	4	61.1	63.7	60.7	179	179	179	19.0693	19.8808	18.9445	10.7	12.7	11.1	19	15.5	18.5	1500	1080	1420	49	45.472	48.328	45.5	38.3	43.8	200	169	205	612	526	605	0.99	1.04	1	1.7	1.89	1.72	2.91	3.33	3.04	6.11	7.74	7.46	5.38	6.02	5.45	34.5
	2	17	5	58.5	60.8	57.8	178	178	178	18.4636	19.1895	18.2426	11.3	14.5	11.8	20.5	17.5	20	1840	1260	1800	51.856	46.984	51.52	45.7	41.9	45.3	229	190	222	648	620	656	0.89	1	0.88	1.63	1.82	1.61	2.85	2.99	2.92	6.11	7.18	6.97	5.26	5.88	5.37	33.99
	2	17	4	61.7	63.2	62.3	174	174	174	20.3792	20.8746	20.5774	12.7	14.6	13	21	17	20	2080	1320	1900	53.872	47.488	52.36	45	42.9	45.3	200	176	204	606	537	608	0.91	1.01	0.96	1.75	1.81	1.73	2.99	3.15	3.02	7.3	7.61	7.46	5.31	5.76	5.39	32.11
	2	17	5	56.7	59.5	57.8	181	181	181	17.3072	18.1618	17.6429	14.3	17.4	14.4	18.5	15.5	17.5	1640	1240	1540	50.176	46.816	49.336	47.4	42.7	46.4	232	160	219	599	556	596	0.97	0.98	0.98	1.6	1.79	1.63	2.94	3.12	3.04	6.52	7.39	7.11	5.34	5.79	5.46	33.31
	Mean	16.55	4.1	62.625	65.33	63.08	174.65	174.65	174.65	20.6559	21.5441	20.8044	12.15	14.86	12.68	19.625	15.975	18.8	1786	1344	1700	51.4024	47.6896	50.68	43.205	38.76	42.37	218.45	185.1	223.5	618.3	563.25	615.5	0.944	1.041	0.972	1.6615	1.788	1.6685	2.874	3.1	2.947	6.399	6.962	6.771	5.181	5.617	5.2355	33.101
	Sd	0.510418	0.552506	6.19243	6.55391	6.27917	6.20081	6.20081	6.20081	3.002	3.12728	3.02781	1.14823	1.3709	0.93223	1.54643	1.21909	1.50787	259.4	198.584	247.259	2.17896	1.66811	2.07697	3.73285	3.46264	3.55825	15.7963	14.097	12.12	26.238	37.9887	29.1773	0.0393901	0.0493004	0.039283	0.0557509	0.0586336	0.0515318	0.0743675	0.107508	0.0629202	0.382827	0.429107	0.387596	0.214351	0.205147	0.193022	1.21645
[truncated: 27 more columns]

## Sheet: Psycho
	Group	Enjoy_1	Enjoy_2	Enjoy_3	Enjoy_4	Enjoy_Ave	Rpe_1	Rpe_2	Rpe_3	Rpe_4	Rpe_Ave	Int_Load_1	Int_Load_2	Int_Load_3	Int_Load_4	Int_Load_Tot	Int_Load_Ave
SSG	1	27	31	32	30	30	16	17	16	17	16.5	192	238	256	306	992	248
	1	25	28	32	31	29	17	15	16	17	16.25	204	210	256	306	976	244
	1	30	32	33	32	31.75	15	17	15	16	15.75	180	238	240	288	946	236.5
	1	23	26	30	31	27.5	15	17	17	18	16.75	180	238	272	324	1014	253.5
	1	24	27	31	30	28	17	18	16	17	17	204	252	256	306	1018	254.5
	1	29	31	32	31	30.75	18	16	15	16	16.25	216	224	240	288	968	242
	1	28	32	33	34	31.75	16	16	18	17	16.75	192	224	288	306	1010	252.5
	1	28	33	33	29	30.75	17	15	18	18	17	204	210	288	324	1026	256.5
	1	27	30	32	30	29.75	18	16	17	18	17.25	216	224	272	324	1036	259
	1	31	34	32	33	32.5	16	18	16	17	16.75	192	252	256	306	1006	251.5
	1	29	27	25	28	27.25	16	16	16	16	16	192	224	256	288	960	240
	1	28	26	27	28	27.25	15	16	14	16	15.25	180	224	224	288	916	229
	1	30	29	32	31	30.5	17	14	15	16	15.5	204	196	240	288	928	232
	1	25	25	26	27	25.75	17	16	16	16	16.25	204	224	256	288	972	243
	1	27	25	29	30	27.75	18	16	16	17	16.75	216	224	256	306	1002	250.5
	1	28	27	30	29	28.5	17	16	18	16	16.75	204	224	288	288	1004	251
	1	26	31	33	33	30.75	16	18	17	16	16.75	192	252	272	288	1004	251
	1	28	25	28	29	27.5	16	16	16	14	15.5	192	224	256	252	924	231
	1	28	32	29	34	30.75	17	15	15	16	15.75	204	210	240	288	942	235.5
	1	31	30	29	31	30.25	17	16	16	15	16	204	224	256	270	954	238.5
	Mean	27.6	29.05	30.4	30.55	29.4	16.55	16.2	16.15	16.45	16.3375	198.6	226.8	258.4	296.1	979.9	244.975
	Sd	2.18608	2.91051	2.45807	1.95946	1.86096	0.944513	1.05631	1.08942	0.998683	0.575114	11.3342	14.7883	17.4308	17.9763	36.3056	9.07639
HIIT	2	18	19	17	18	18	17	19	18	19	18.25	204	266	288	342	1100	275
	2	19	17	18	16	17.5	18	17	17	19	17.75	216	238	272	342	1068	267
	2	21	19	20	18	19.5	17	18	20	18	18.25	204	252	320	324	1100	275
	2	17	16	16	15	16	18	17	17	19	17.75	216	238	272	342	1068	267
	2	19	18	18	17	18	18	16	18	20	18	216	224	288	360	1088	272
	2	15	19	14	18	16.5	18	18	19	18	18.25	216	252	304	324	1096	274
	2	16	20	15	19	17.5	16	17	17	19	17.25	192	238	272	342	1044	261
	2	18	17	17	16	17	19	18	16	19	18	228	252	256	342	1078	269.5
	2	17	15	16	14	15.5	18	17	20	19	18.5	216	238	320	342	1116	279
	2	16	16	15	15	15.5	19	19	17	19	18.5	228	266	272	342	1108	277
	2	16	20	19	21	19	18	18	19	20	18.75	216	252	304	360	1132	283
	2	17	18	18	20	18.25	16	17	18	20	17.75	192	238	288	360	1078	269.5
	2	18	19	17	20	18.5	17	18	18	19	18	204	252	288	342	1086	271.5
	2	17	20	19	21	19.25	18	18	19	19	18.5	216	252	304	342	1114	278.5
	2	15	18	18	21	18	16	17	19	20	18	192	238	304	360	1094	273.5
	2	14	21	19	20	18.5	19	18	18	19	18.5	228	252	288	342	1110	277.5
	2	18	20	19	21	19.5	18	18	19	20	18.75	216	252	304	360	1132	283
	2	15	19	17	21	18	17	18	19	19	18.25	204	252	304	342	1102	275.5
	2	16	18	18	20	18	16	17	18	20	17.75	192	238	288	360	1078	269.5
	2	17	19	17	21	18.5	17	18	19	19	18.25	204	252	304	342	1102	275.5
	Mean	16.95	18.4	17.35	18.6	17.825	17.5	17.65	18.25	19.2	18.15	210	247.1	292	345.6	1094.7	273.675
	Sd	1.66938	1.56945	1.56525	2.37088	1.20334	1	0.74516	1.06992	0.615587	0.383886	12	10.4322	17.1188	11.0806	21.9308	5.48269
							Week 1	Week 2	Week 3	Week 4	Average
